# Supplementary material for: Clean water generation through a multifunctional activated carbon-TiO2 interfacial solar distillation system
Source: Royal Society of Chemistry journal article supplement (doi:10.1039/d1ra02185k), 2021-01-01
Supplement: d1ra02185k1.pdf [file d1ra02185k1.pdf]

## Supplementary Information

### Clean water generation through a multifunctional activated carbon-TiO<sub>2</sub> interfacial solar distillation system

Submitted to  
*RSC Advances*

Kuan-Yu Chen<sup>a</sup>, Webber Wei-Po Lai<sup>a, b</sup>, Hui-Ju Wang<sup>a</sup>, Cheng-Chieh Lin<sup>c, e</sup>, Chun-Wei Chen<sup>c, d</sup>, Angela Yu-

Chen Lin<sup>\*a, c</sup>

<sup>a</sup> Graduate Institute of Environmental Engineering, National Taiwan University, 71-Chou-shan Road, Taipei 106, Taiwan

<sup>b</sup> Department of Environmental Science and Engineering, Tunghai University, Taichung 407, Taiwan

<sup>c</sup> International Graduate Program of Molecular Science and Technology, National Taiwan University (NTU-MST), Taipei 106, Taiwan

<sup>d</sup> Department of Materials Science and Engineering, National Taiwan University, No. 1, Sec. 4, Roosevelt Rd., Taipei 106, Taiwan

<sup>e</sup> Molecular Science and Technology Program, Taiwan International Graduate Program, Academia Sinica, Taiwan

(\*Corresponding author: [yuchenlin@ntu.edu.tw](mailto:yuchenlin@ntu.edu.tw) Tel.: ±886-2-3366-4386)

### Text S1 Analysis of chlorine ions

A 10 mL sample was placed in a sample cell, and 0.8 mL of mercuric thiocyanate solution was added. After mixing, 0.4 mL of a ferric ion solution was added. The sample turned orange if Cl<sup>-</sup> was present in the sample. After 2 min, the absorbance of the sample at 455 nm was measured using a DR 6000 UV-Vis spectrophotometer (Hach, USA). For the original saline water, the samples were diluted 1750 times to adhere to the concentration range of the method.

### Text S2 Calculation of the evaporation rate, $r_{evp}$

The evaporation rate,  $r_{evp}$ , at a given time  $t$  was determined by calculating the average of the slopes from time  $t - 5$  to  $t$  and  $t$  to  $t + 5$  using the following equations:

$$slope_{t-5 \rightarrow t} = \frac{\Delta W_t - \Delta W_{t-5}}{5} \quad S(1)$$

$$slope_{t \rightarrow t+5} = \frac{\Delta W_{t+5} - \Delta W_t}{5} \quad S(2)$$

$$r_{evp,t} = \frac{slope_{t-5 \rightarrow t} + slope_{t \rightarrow t+5}}{2} \quad S(3)$$

where  $\Delta W_t$  (kg/m<sup>2</sup>) represents the total amount of steam generated at time  $t$  and  $slope_{t-5 \rightarrow t}$  represents the slope between time  $t-5$  and  $t$ .

**Table S1.** Physicochemical properties of (a) activated carbon, (b) P25 TiO<sub>2</sub> and (c) PE foam.

(a)

| <b>activated carbon</b>         |                     |
|---------------------------------|---------------------|
| <b>form</b>                     | untreated, granular |
| <b>autoignition temperature</b> | 450 °C              |
| <b>resistivity</b>              | 1375 μΩ-cm at 20 °C |
| <b>particle size</b>            | 20-60 mesh          |
| <b>melting point</b>            | 3550 °C             |

(b)

| <b>P25 TiO<sub>2</sub></b> |                         |
|----------------------------|-------------------------|
| <b>assay</b>               | ≥ 99.5%                 |
| <b>particle size</b>       | 21 nm                   |
| <b>surface area</b>        | 35–65 m <sup>2</sup> /g |
| <b>melting point</b>       | 1850 °C                 |
| <b>density</b>             | 4.26 g/mL at 25 °C      |

(c)

| <b>polyethylene foam</b> |                                               |
|--------------------------|-----------------------------------------------|
| <b>formula</b>           | (C <sub>2</sub> H <sub>4</sub> ) <sub>n</sub> |
| <b>melting point</b>     | 115–135 °C                                    |
| <b>density</b>           | 0.88–0.96 g/cm <sup>3</sup>                   |
| <b>log P</b>             | 1.02620                                       |

**Table S2** Measured temperature values using the AC-P25/foam and submerged AC-P25 systems.

| <b>T (°C)</b>  |                      |                   |                         |                   |
|----------------|----------------------|-------------------|-------------------------|-------------------|
| <b>t (min)</b> | <b>AC-P25/foam</b>   |                   | <b>submerged AC-P25</b> |                   |
|                | <b>water surface</b> | <b>bulk water</b> | <b>water surface</b>    | <b>bulk water</b> |
| <b>0</b>       | 18.4                 | 20                | 18.4                    | 20                |
| <b>15</b>      | 29.6                 | 23.8              | 33.3                    | 31                |
| <b>30</b>      | 32.7                 | 27.4              | 34.3                    | 33.2              |
| <b>40</b>      | 33.4                 | 27.8              | 36                      | 35.8              |

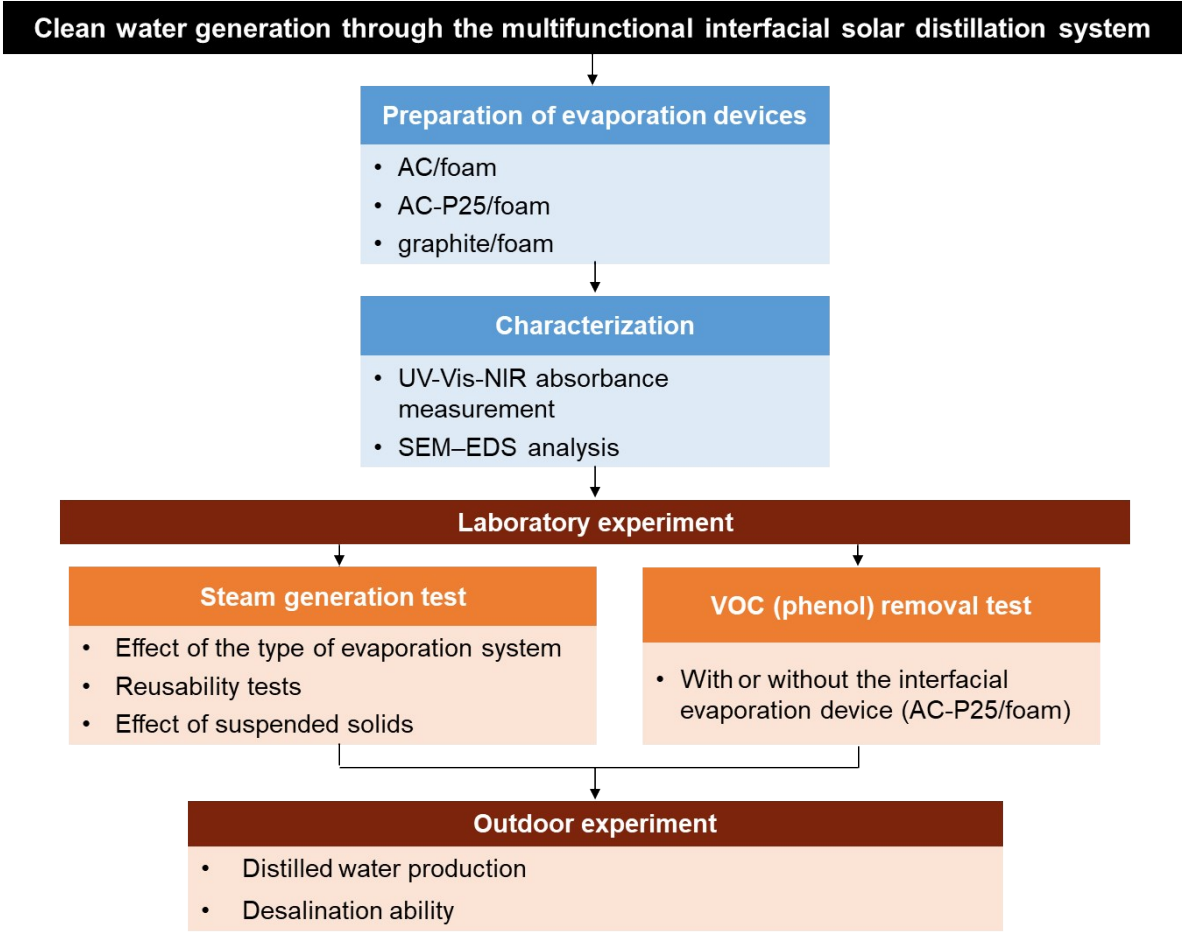

**Figure S1.** Flowchart of the experimental methodology.

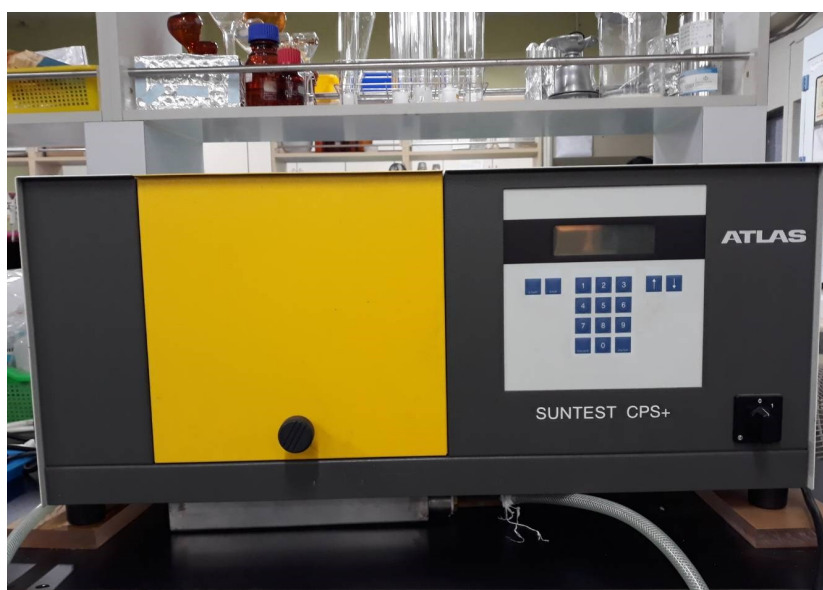

**Figure S2.** Photo of the solar simulator.

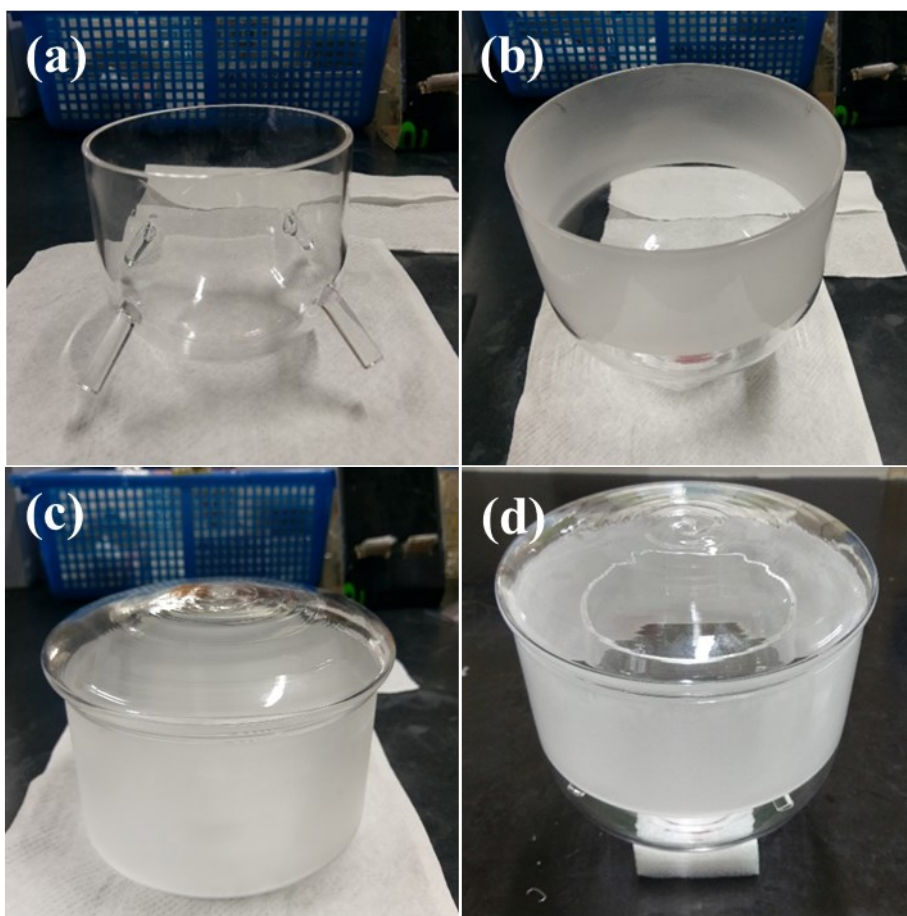

**Figure S3.** Pictures of the (a) inner bowl, (b) outer bowl, (c) top cover and (d) combined solar still device.

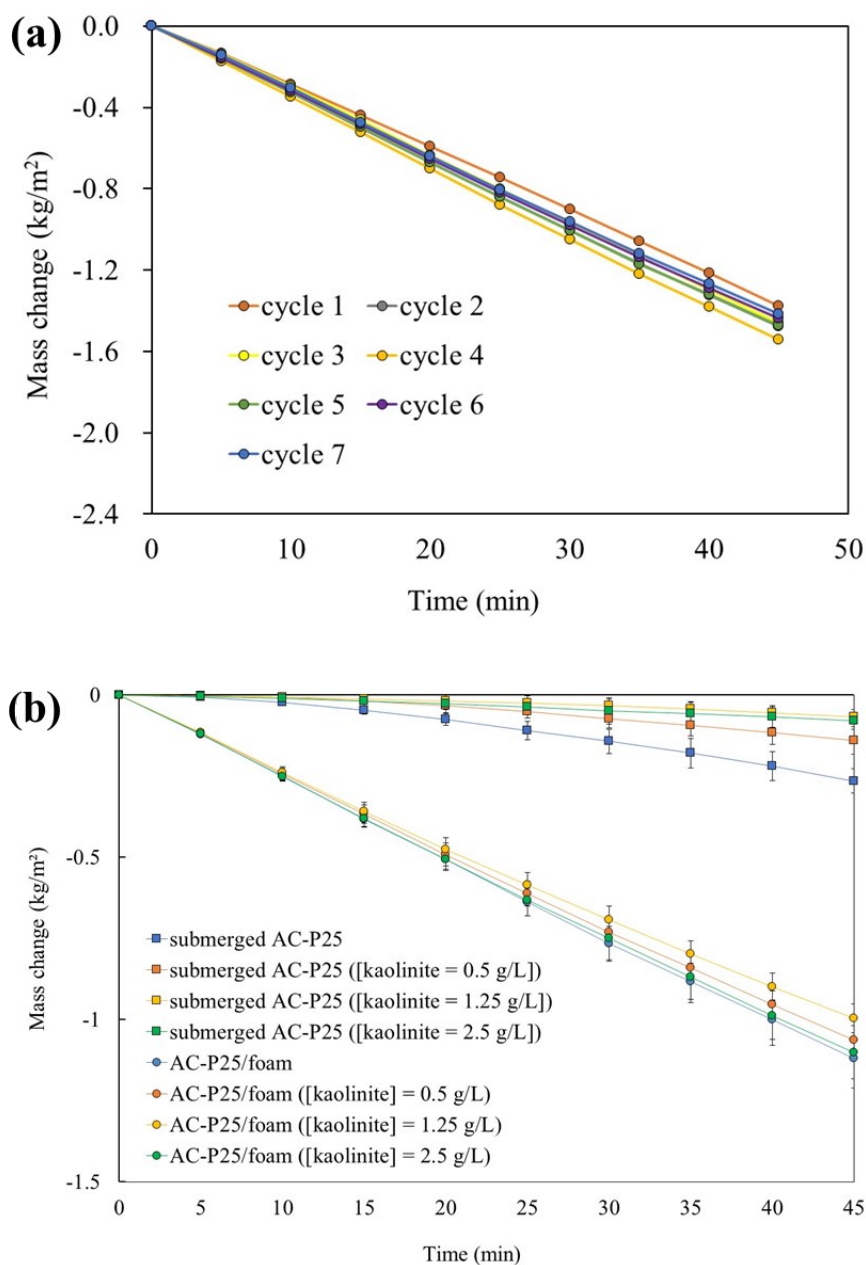

**Figure S4.** Mass change profile of (a) seven cycle tests (source water: synthetic saline water (3.5 wt% sea salt dissolved in DI water)) and (b) suspended solid tests (source water: DI water in the presence of kaolinite).



Before use

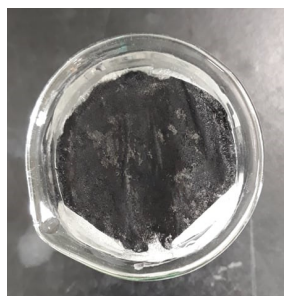

Cycle 1

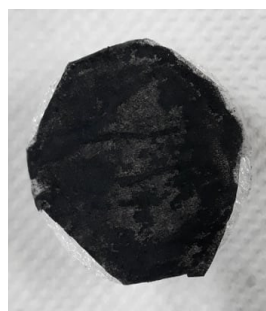

Cycle 2

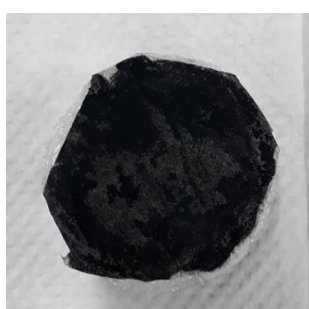

Cycle 3

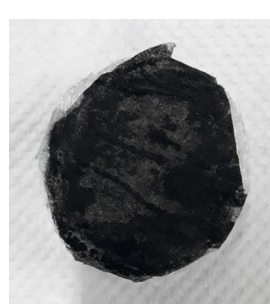

Cycle 4

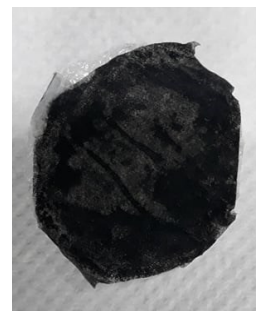

Cycle 5

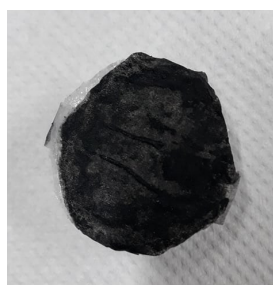

Cycle 6

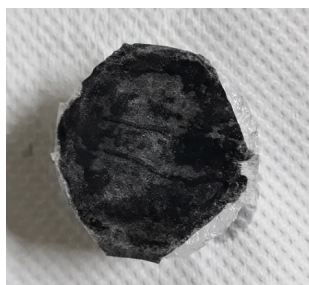

Cycle 7

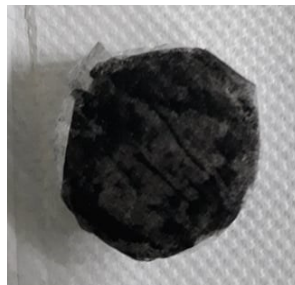

**Figure S5.** Pictures of AC-P25/foam after different numbers of cycles.

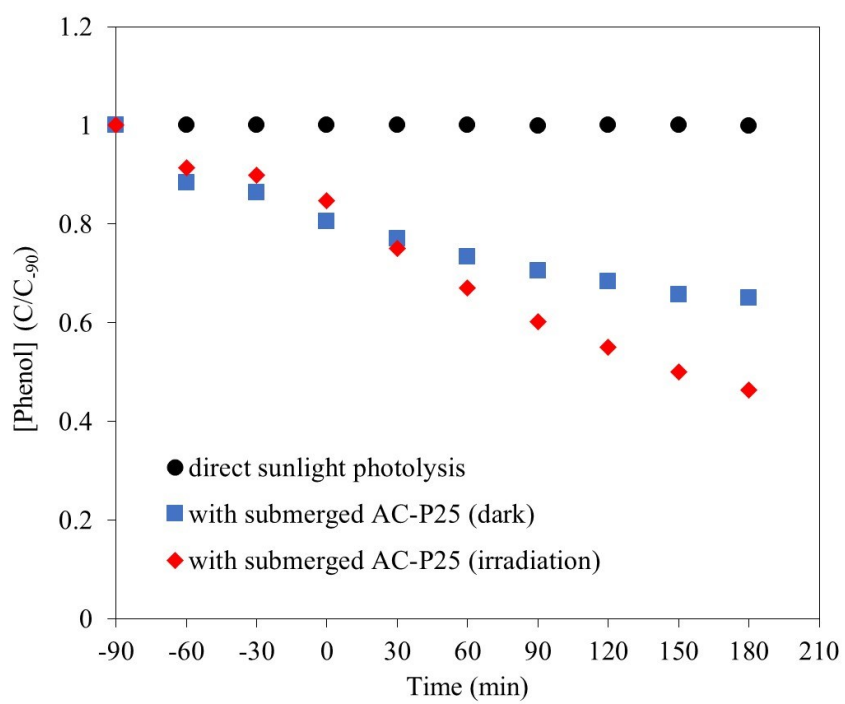

**Figure S6.** Phenol removal test using submerged AC-P25 (source water: 10 mg L<sup>-1</sup> phenol solution).

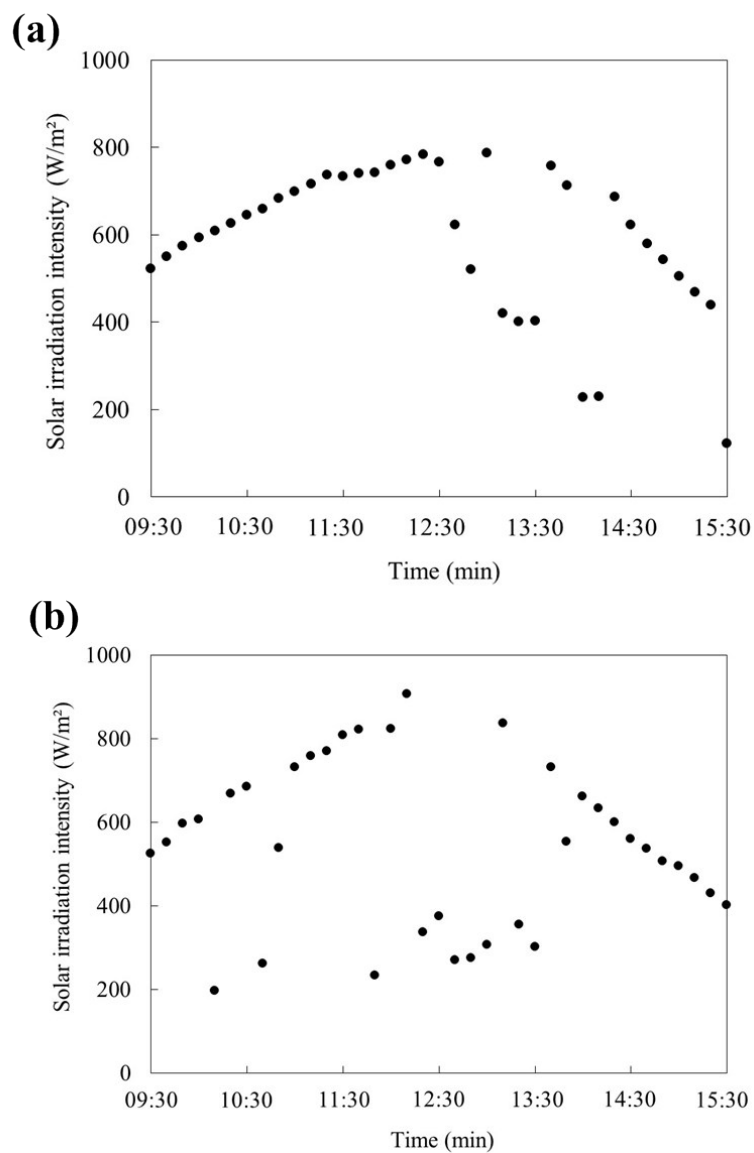

**Figure S7.** Solar flux density: (a) for the experiment without AC-P25/foam and (b) for the experiment with AC-P25/foam.

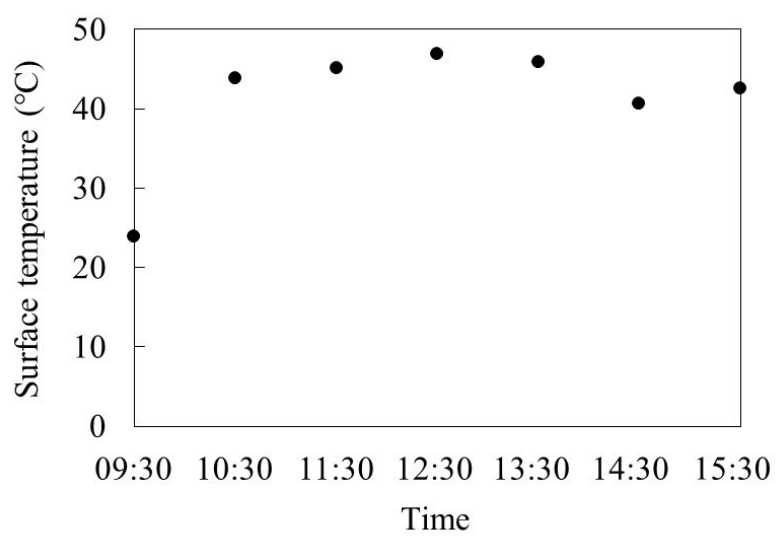

**Figure S8.** Surface temperature of the interfacial evaporation device.
